# Supplementary material
Source: Springer Nature journal article supplement (https://www.springermedizin.de/resource/supplementary/13049_2014_748_MOESM3_ESM.pdf/9667208)
Supplement: MOESM3 [file 9667208]

## ROC Curve

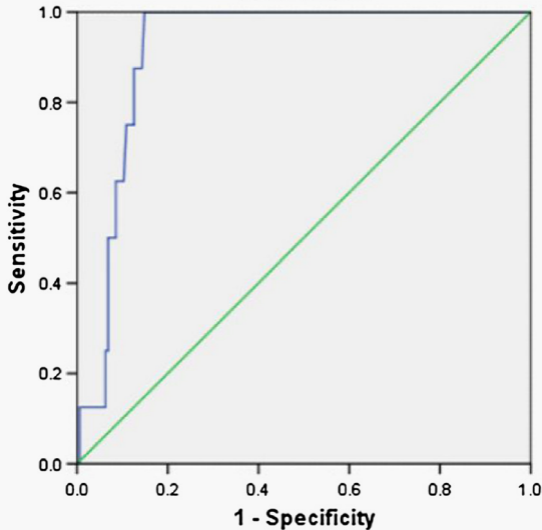

Serum total bilirubin level  $\geq 43.6\mu\text{mol/L}$

Sensitivity: 100%

Specificity: 85.1%

Area under ROC Curve: 0.92

95% confidence Interval: 0.87 - 0.96
